# Supplementary material for: Liquid Crystal@Nanosilver Catalytic Amplification—Aptamer Trimode Biosensor for Trace Pb2+
Source: MDPI journal article supplement (doi:10.3390/ijms24032920), 2023-02-02
Supplement: s1 [file s1]

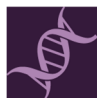

## Supplementary Materials

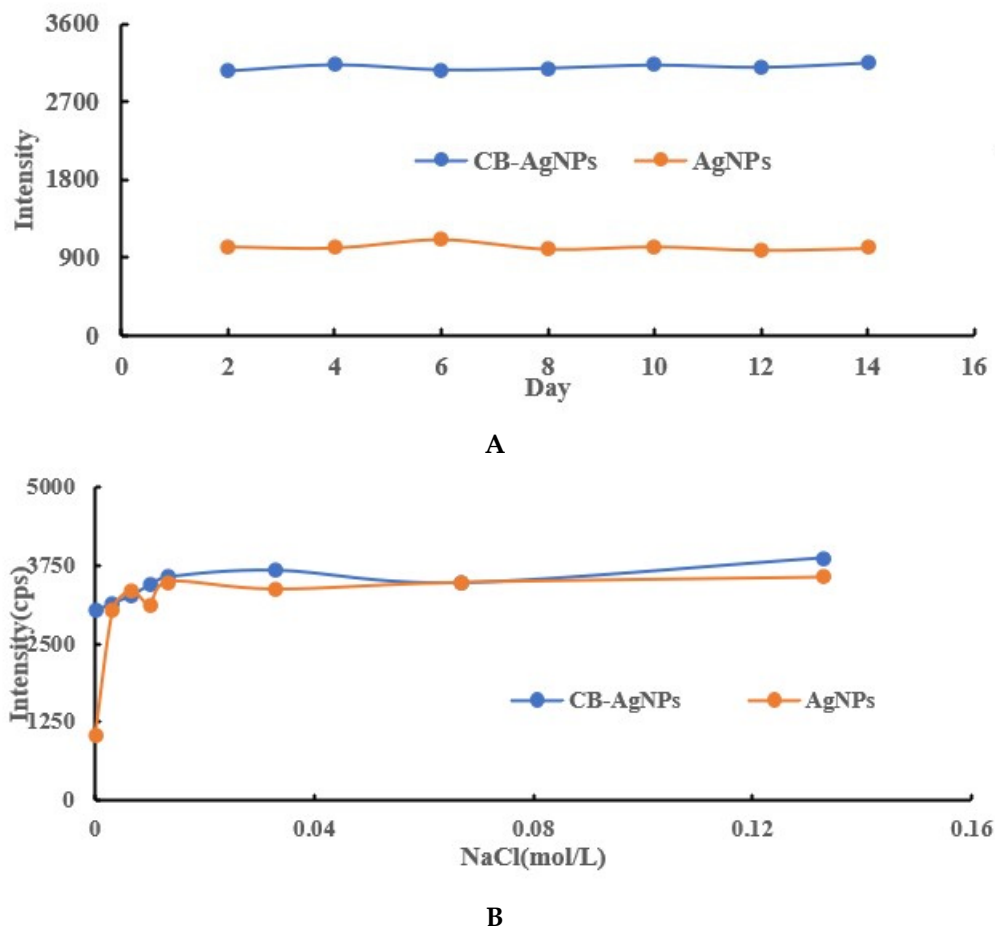

**Figure S1.** Stability of AgNPs and CB@AgNPs. **A:** The RRS signal of AgNPs and CB@AgNPs varying with time; **B:** The RRS signal of AgNPs and CB@AgNPs varying with NaCl.

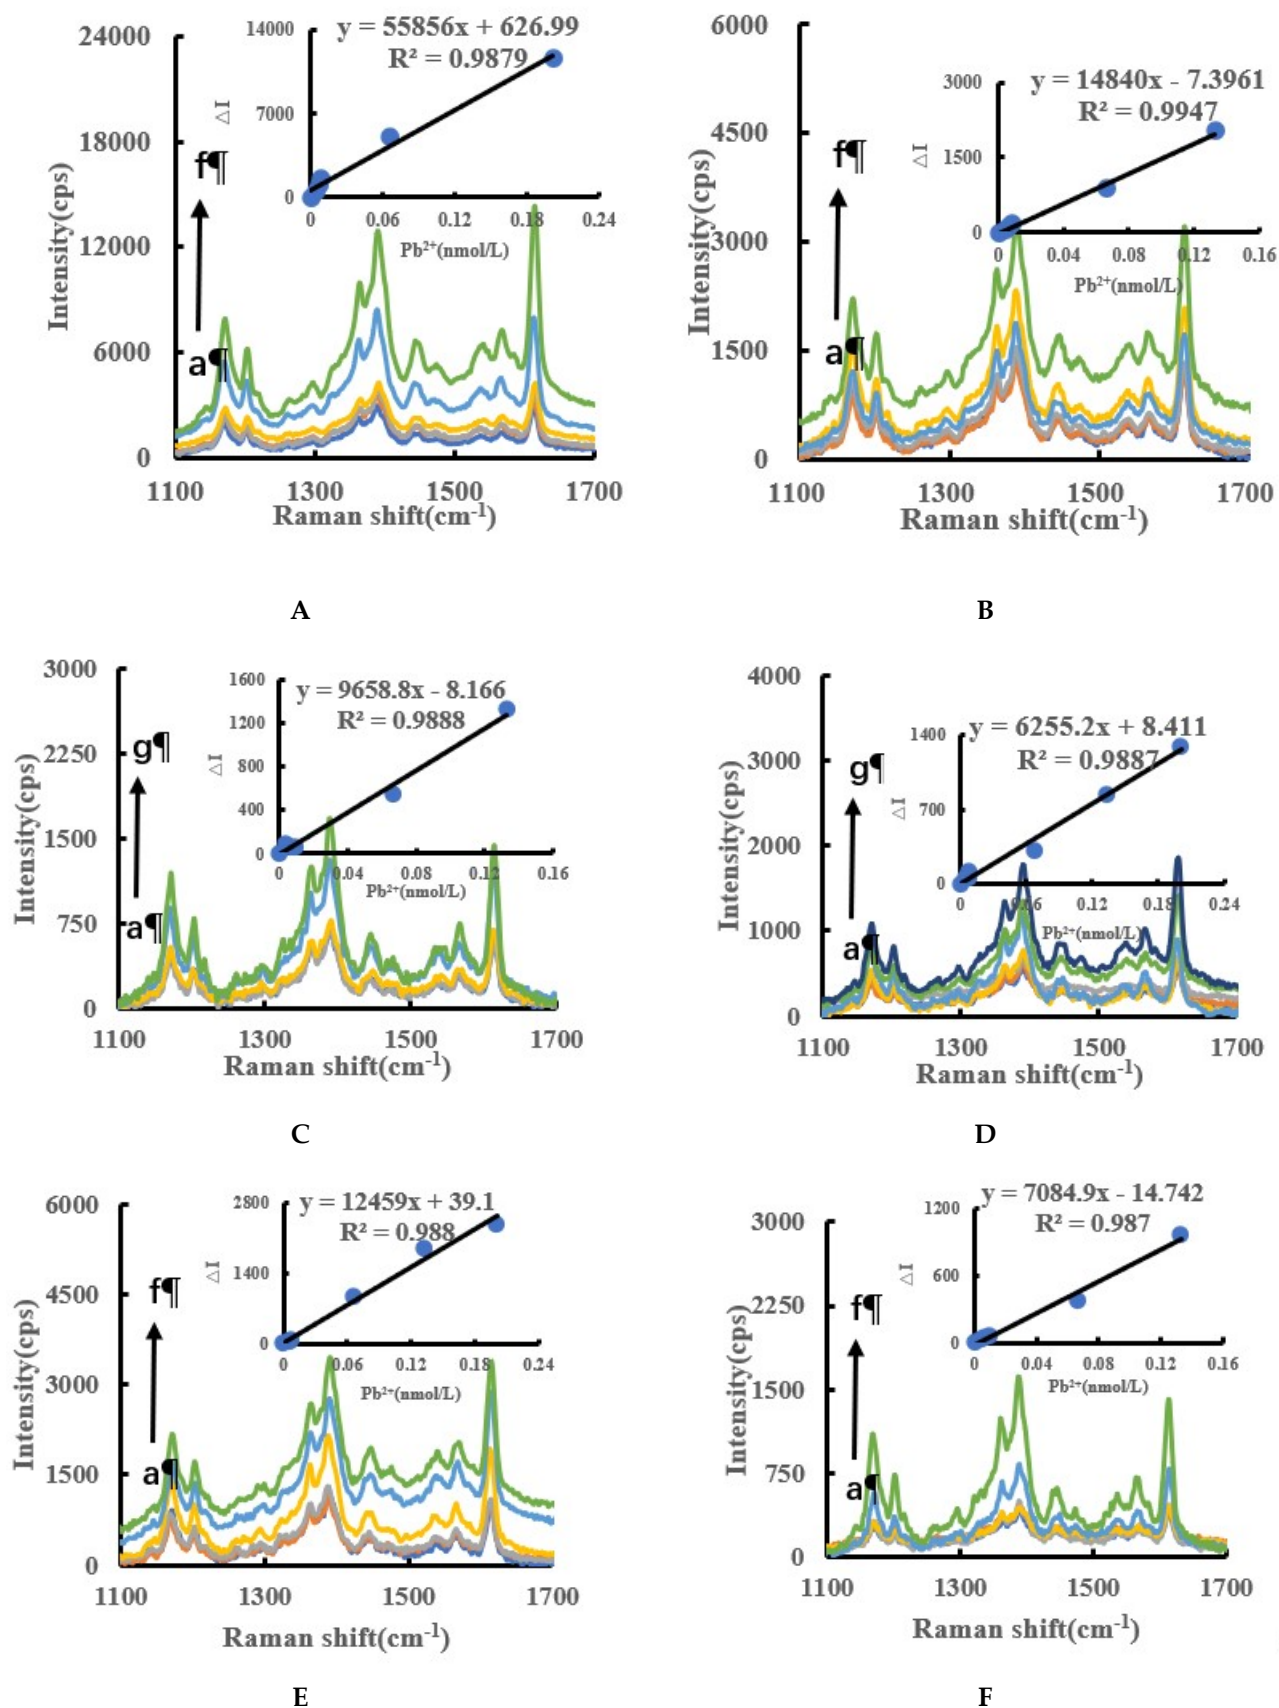

**Figure S2.** SERS spectra of AgNPs /LC -Fo-AgNO<sub>3</sub>-Apt-inorganic pollutants system. A: a-f: (0, 4.47×10<sup>-3</sup>, 6.7×10<sup>-3</sup>, 8.94×10<sup>-3</sup>, 6.7×10<sup>-2</sup>, 0.133) nmol/L Pb<sup>2+</sup> +0.667 nmol/L Apt<sub>16</sub>+73.98 μmol/L NaAc-

HAc+1.33  $\mu\text{mol/L}$  AgNPs +1.33 mmol/L  $\text{AgNO}_3$ +0.1 mol/L Fo+0.67  $\mu\text{mol/L}$  VB4r+0.067 mol/L NaCl; **B**: a-f: (0,  $4.47 \times 10^{-3}$ ,  $6.7 \times 10^{-3}$ ,  $8.94 \times 10^{-3}$ ,  $6.7 \times 10^{-2}$ , 0.133) nmol/L  $\text{Pb}^{2+}$  +0.667 nmol/L  $\text{Apt}_{\text{rB}}$  +73.98  $\mu\text{mol/L}$  NaAc-HAc+1.33  $\mu\text{mol/L}$  CB +1.33 mmol/L  $\text{AgNO}_3$ +0.1 mol/L Fo+0.67  $\mu\text{mol/L}$  VB4r+0.067 mol/L NaCl; **C**: a-f: (0,  $4.47 \times 10^{-3}$ ,  $6.7 \times 10^{-3}$ ,  $8.94 \times 10^{-3}$ ,  $6.7 \times 10^{-2}$ , 0.133) nmol/L  $\text{Pb}^{2+}$  +0.667 nmol/L  $\text{Apt}_{\text{rB}}$  +73.98  $\mu\text{mol/L}$  NaAc-HAc+1.33  $\mu\text{mol/L}$  OA+1.33 mmol/L  $\text{AgNO}_3$ +0.1 mol/L Fo+0.67  $\mu\text{mol/L}$  VB4r+0.067 mol/L NaCl; **D**: a-g: (0,  $4.47 \times 10^{-3}$ ,  $6.7 \times 10^{-3}$ ,  $8.94 \times 10^{-3}$ ,  $6.7 \times 10^{-2}$ , 0.133, 0.201) nmol/L  $\text{Pb}^{2+}$  +0.667 nmol/L  $\text{Apt}_{\text{rB}}$  +73.98  $\mu\text{mol/L}$  NaAc-HAc+1.33  $\mu\text{mol/L}$  CB@AgNPs+1.33 mmol/L  $\text{AgNO}_3$ +0.1 mol/L Fo+0.67  $\mu\text{mol/L}$  VB4r+0.067 mol/L NaCl; **E**: a-f: (0,  $4.47 \times 10^{-3}$ ,  $6.7 \times 10^{-3}$ ,  $6.7 \times 10^{-2}$ , 0.133, 0.201) nmol/L  $\text{Pb}^{2+}$  +0.667 nmol/L  $\text{Apt}_{\text{rB}}$  +73.98  $\mu\text{mol/L}$  NaAc-HAc+1.33  $\mu\text{mol/L}$  DB+1.33 mmol/L  $\text{AgNO}_3$ +0.1 mol/L Fo+0.67  $\mu\text{mol/L}$  VB4r+0.067 mol/L NaCl. ; **F**: a-f: (00,  $4.47 \times 10^{-3}$ ,  $6.7 \times 10^{-3}$ ,  $8.94 \times 10^{-3}$ ,  $6.7 \times 10^{-2}$ , 0.133) nmol/L  $\text{Pb}^{2+}$  +0.667 nmol/L  $\text{Apt}_{\text{rB}}$  +73.98  $\mu\text{mol/L}$  NaAc-HAc+1.33  $\mu\text{mol/L}$  DE+1.33 mmol/L  $\text{AgNO}_3$ +0.1 mol/L Fo+0.67  $\mu\text{mol/L}$  VB4r+0.067 mol/L NaCl.

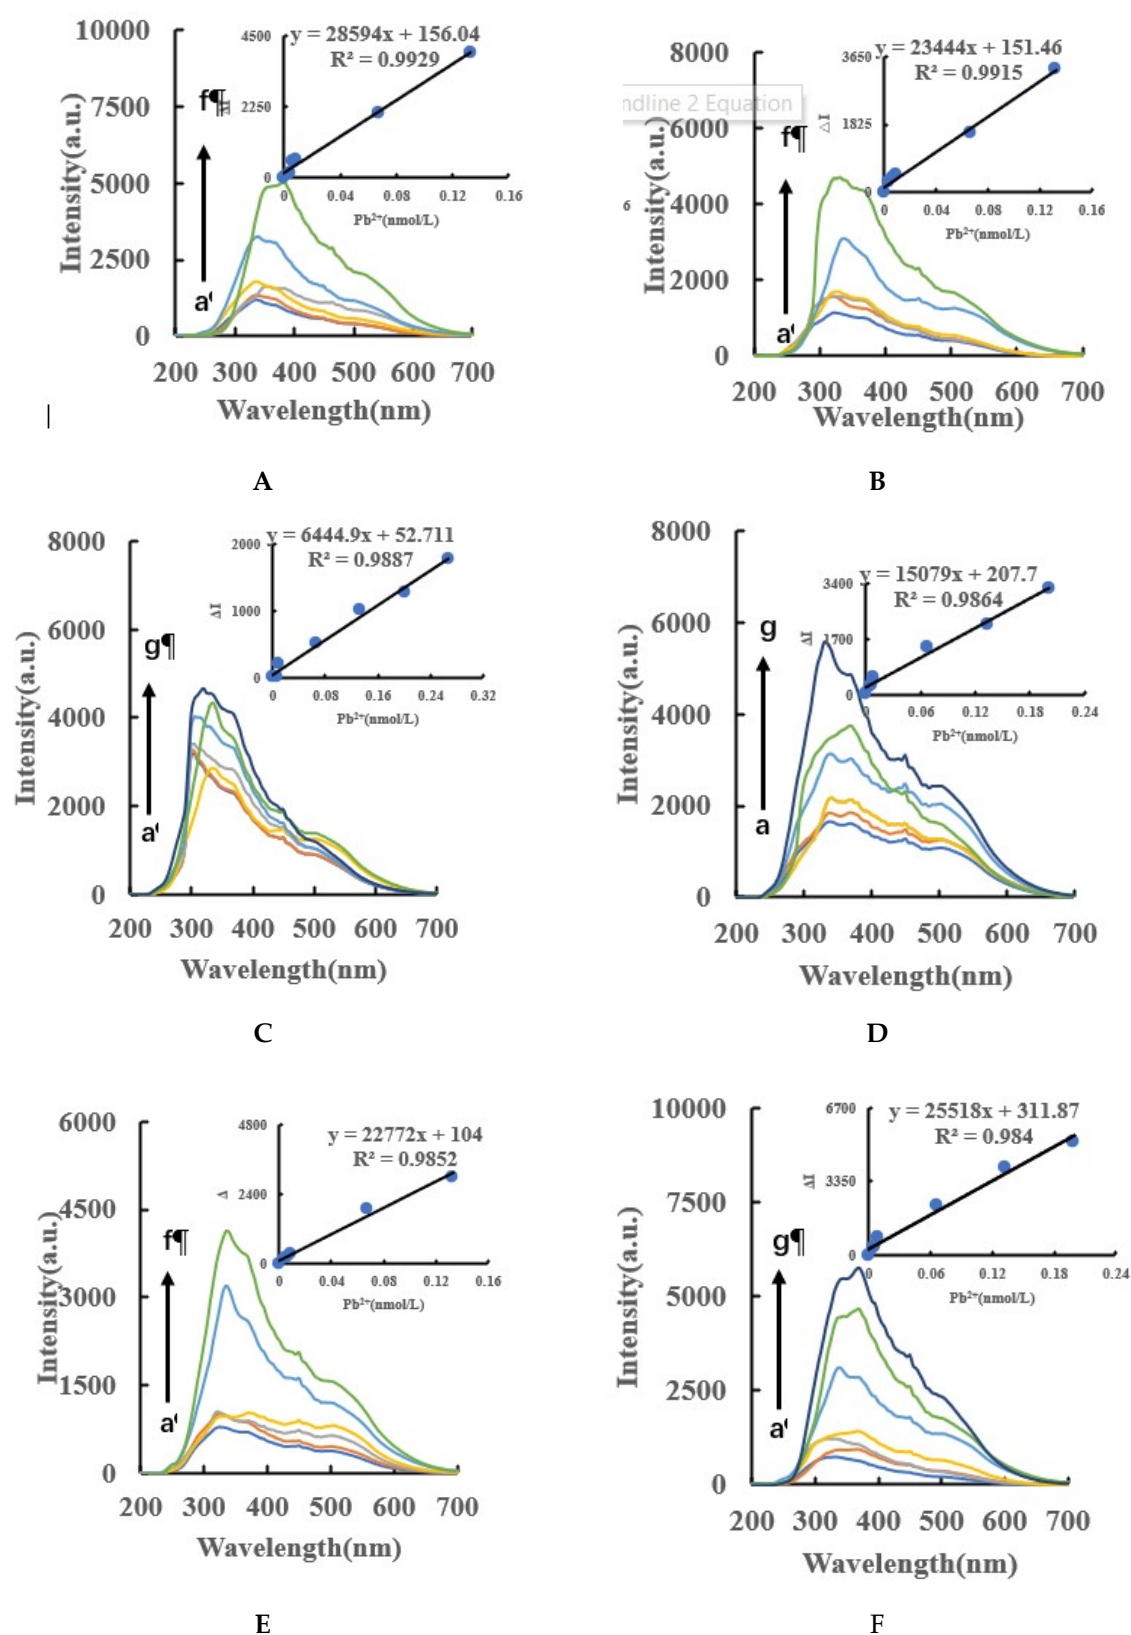

**Figure S3.** RRS spectra of AgNPs/LC-Fo-AgNO<sub>3</sub>-Apt- inorganic pollutants system. **A:** a-f: (0,  $4.47 \times 10^{-3}$ ,  $6.7 \times 10^{-3}$ ,  $8.94 \times 10^{-3}$ ,  $6.7 \times 10^{-2}$ , 0.133) nmol/L Pb<sup>2+</sup> + 0.667 nmol/L Apt<sub>FB</sub> + 73.98 μmol/L NaAc-HAc + 1.33 μmol/L AgNPs + 1 mmol/L AgNO<sub>3</sub> + 0.1 mol/L Fo; **B:** a-f: (0,  $4.47 \times 10^{-3}$ ,  $6.7 \times 10^{-3}$ ,  $8.94 \times 10^{-3}$ ,  $6.7 \times 10^{-2}$ , 0.133) nmol/L Pb<sup>2+</sup> + 0.667 nmol/L Apt<sub>FB</sub> + 73.98 μmol/L NaAc-HAc + 1.33 μmol/L CB + 1 mmol/L AgNO<sub>3</sub> + 0.1 mol/L Fo; **C:** a-g: (0,  $6.7 \times 10^{-3}$ ,  $8.94 \times 10^{-3}$ ,  $6.7 \times 10^{-2}$ , 0.133, 0.201, 0.267) nmol/L Pb<sup>2+</sup> + 0.667 nmol/L Apt<sub>FB</sub> + 0.667 nmol/L Apt<sub>FB</sub> + 73.98 μmol/L NaAc-HAc + 1.33 μmol/L OA + 1 mmol/L

AgNO<sub>3</sub>+0.1 mol/L Fo; **D**: a-g: (0, 4.47×10<sup>-3</sup>, 6.7×10<sup>-3</sup>, 8.94×10<sup>-3</sup>, 6.7×10<sup>-2</sup>, 0.133, 0.201) nmol/L Pb<sup>2+</sup> +0.667 nmol/L Apt<sub>Pb</sub> + +73.98 μmol/L NaAc-HAc+1.33 μmol/L HA+1 mmol/L AgNO<sub>3</sub>+0.1 mol/L Fo; **E**: a-f: (0, 4.47×10<sup>-3</sup>, 6.7×10<sup>-3</sup>, 8.94×10<sup>-3</sup>, 6.7×10<sup>-2</sup>, 0.133) nmol/L Pb<sup>2+</sup> +0.667 nmol/L Apt<sub>Pb</sub> + +73.98 μmol/L NaAc-HAc+1.33 μmol/L DB+1 mmol/L AgNO<sub>3</sub>+0.1 mol/L Fo; **F**: a-g: (0, 4.47×10<sup>-3</sup>, 6.7×10<sup>-3</sup>, 8.94×10<sup>-3</sup>, 6.7×10<sup>-2</sup>, 0.133, 0.201) nmol/L Pb<sup>2+</sup> +0.667 nmol/L Apt<sub>Pb</sub> + +73.98 μmol/L NaAc-HAc+1.33 μmol/L DE+1 mmol/L AgNO<sub>3</sub>+0.1 mol/L Fo.

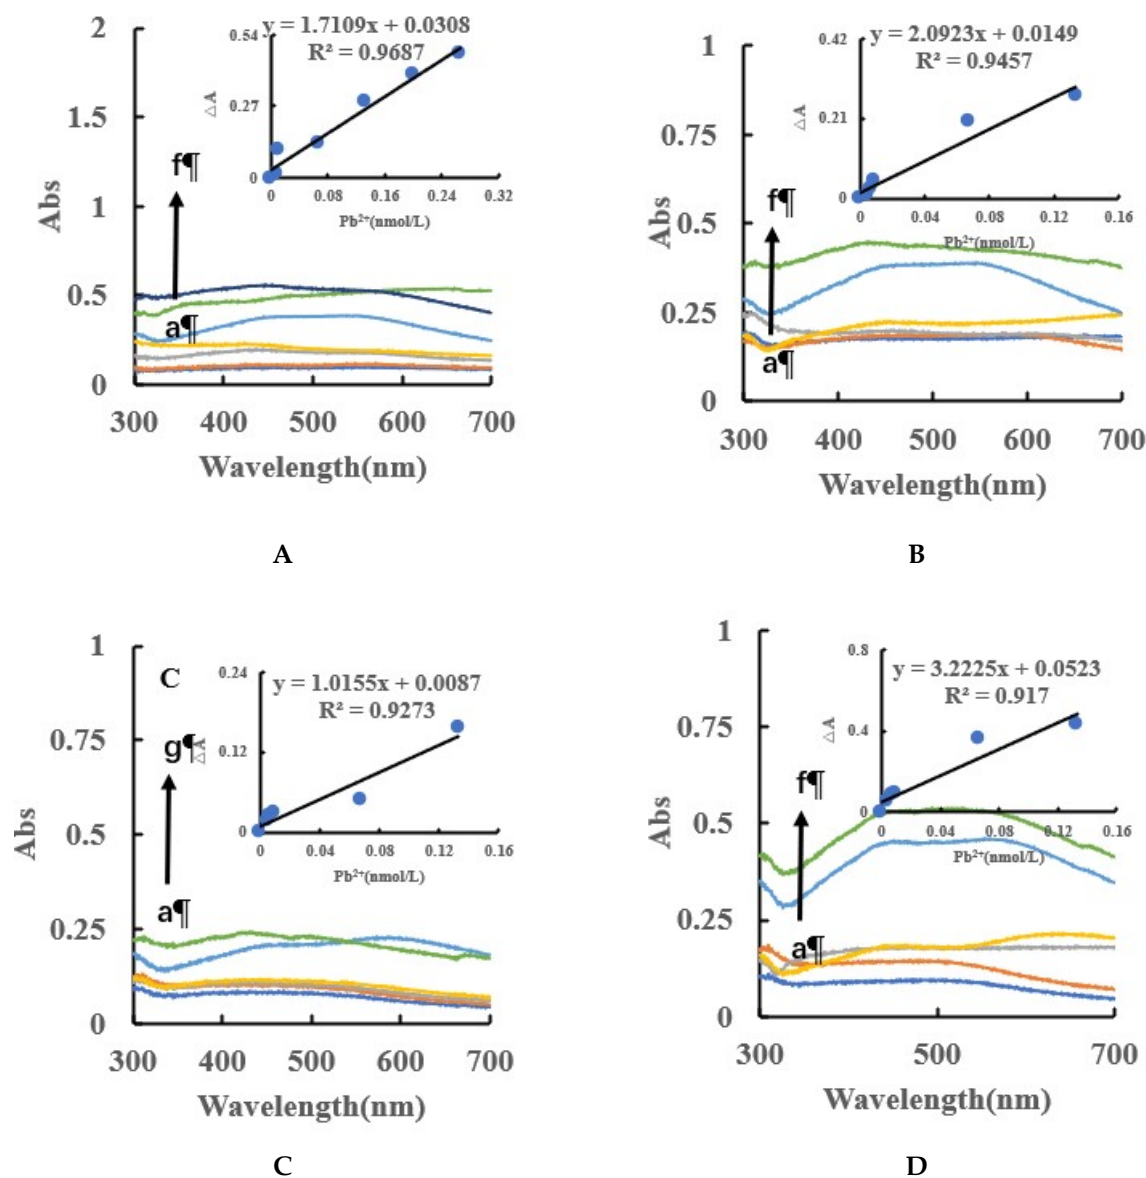

**Figure S4.** Abs spectra of Apt<sub>Pb</sub> AgNPs/LC-Fo-AgNO<sub>3</sub>-Pb<sup>2+</sup> system. **A**: a-f: (0, 6.7×10<sup>-3</sup>, 8.94×10<sup>-3</sup>, 6.7×10<sup>-2</sup>, 0.133, 0.201, 0.267) nmol/L Pb<sup>2+</sup> +0.667 nmol/L Apt<sub>Pb</sub>+73.98 μmol/L NaAc-HAc+1.33 μmol/L OA+1 mmol/L AgNO<sub>3</sub>+0.1 mol/L Fo; **B**: a-f: (0, 4.47×10<sup>-3</sup>, 6.7×10<sup>-3</sup>, 8.94×10<sup>-3</sup>, 6.7×10<sup>-2</sup>, 0.133) nmol/L Pb<sup>2+</sup> +0.667 nmol/L Apt<sub>Pb</sub>+73.98 μmol/L NaAc-HAc+1.33 μmol/L HA +1 mmol/L AgNO<sub>3</sub>+0.1 mol/L Fo; **C**: a-g: (0, 4.47×10<sup>-3</sup>, 6.7×10<sup>-3</sup>, 8.94×10<sup>-3</sup>, 6.7×10<sup>-2</sup>, 0.133) nmol/L Pb<sup>2+</sup> +0.667 nmol/L Apt<sub>Pb</sub> ++0.667 nmol/L Apt<sub>Pb</sub>+73.98 μmol/L NaAc-HAc+1.33 μmol/L DB+1 mmol/L AgNO<sub>3</sub>+0.1 mol/L Fo; **D**: a-g: (0, 4.47×10<sup>-3</sup>, 6.7×10<sup>-3</sup>, 8.94×10<sup>-3</sup>, 6.7×10<sup>-2</sup>, 0.133) nmol/L Pb<sup>2+</sup> +0.667 nmol/L Apt<sub>Pb</sub> + +73.98 μmol/L NaAc-HAc+1.33 μmol/L DE+1 mmol/L AgNO<sub>3</sub>+0.1 mol/L Fo.

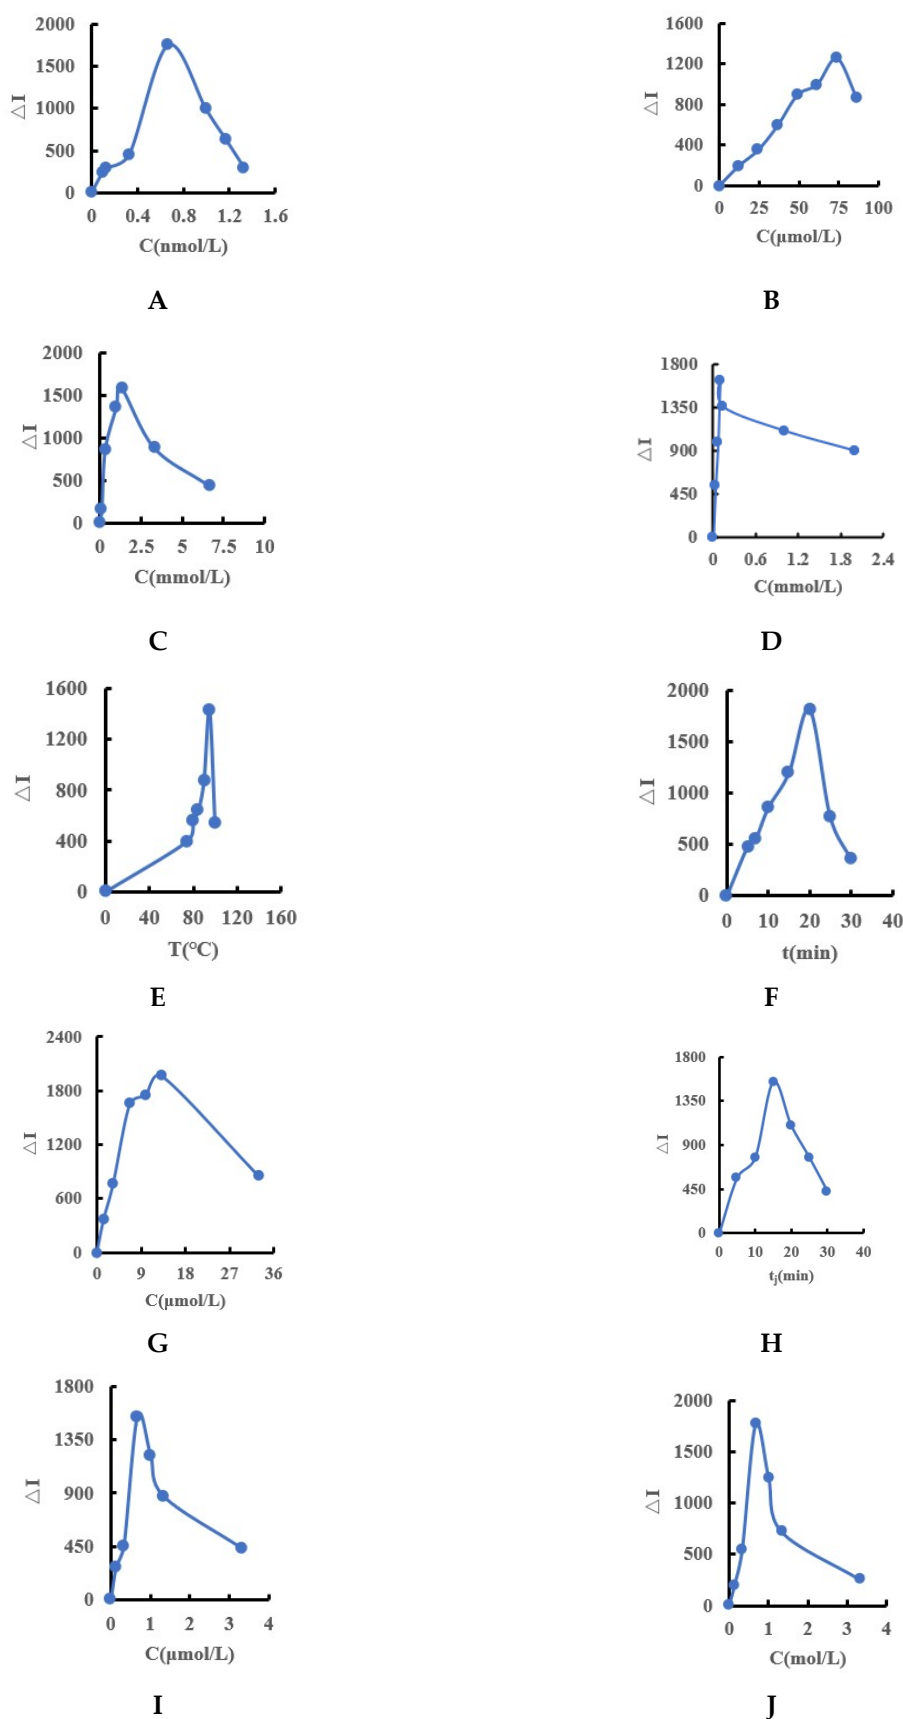

**Figure S5.** Optimization of analysis conditions. A: Apt<sub>trb</sub>; B: NaAc-HAc; C: AgNO<sub>3</sub>; D: Fo; E: reaction temperature; F: reaction time; G: CB@AgNPs; H: standing time; I: NaCl; J: VB4r.

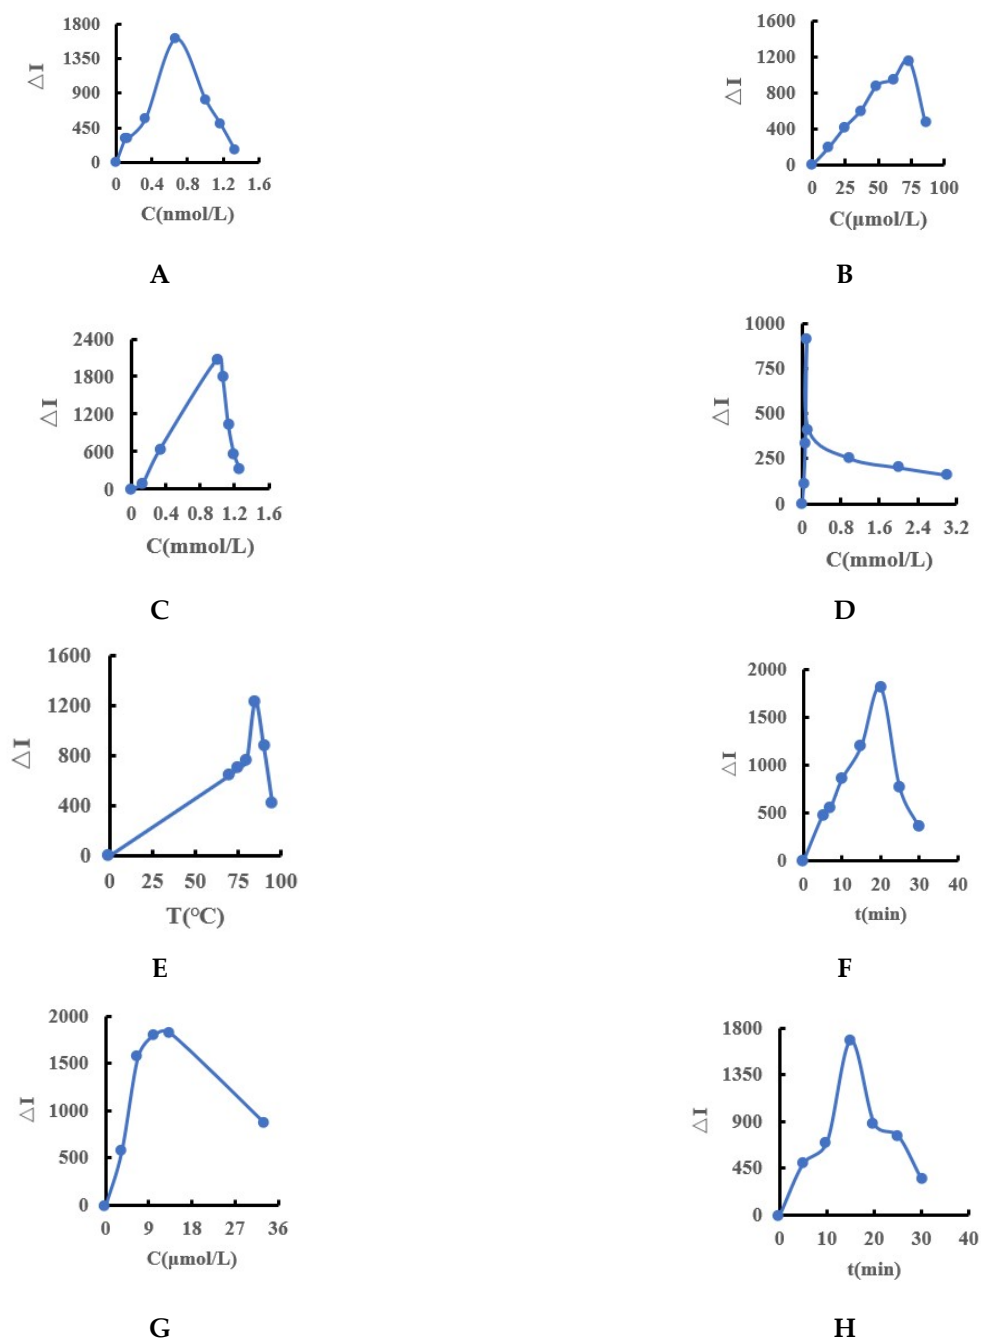

**Figure S6.** Optimization of RRS analysis conditions. **A:** Apt<sup>rb</sup>; **B:** NaAc-HAc; **C:** AgNO<sub>3</sub>; **D:** Fo; **E:** reaction temperature; **F:** reaction time; **G:** CB@AgNPs; **H:** standing time;.



**Table S1.** Comparison of LC/CB@AgNPs/AgNPs catalytic action and inhibitory action of aptamers.

| LC types                        | Working curve                         | Linear range        | Coefficient(R <sup>2</sup> ) |
|---------------------------------|---------------------------------------|---------------------|------------------------------|
| CB                              | $\Delta I = 1382.2C_{CB} - 62.7$      | 0.01–0.1 mmol/L     | 0.9983                       |
| Apt <sub>Pb</sub> -CB           | $\Delta I = 1000.3C_{Apt} - 13.4$     | 0.0667–0.667 nmol/L | 0.9591                       |
| OA                              | $\Delta I = 2895.6C_{OA} - 560.1$     | 0.001–0.01 mmol/L   | 0.91579                      |
| Apt <sub>Pb</sub> -OA           | $\Delta I = 1282.7C_{Apt} - 486.2$    | 0.0667–0.667 nmol/L | 0.90515                      |
| HA                              | $\Delta I = 2245.5C_{HA} - 251.8$     | 0.001–0.01 mmol/L   | 0.9383                       |
| Apt <sub>Pb</sub> -HA           | $\Delta I = 3844.5C_{Apt} - 25.1$     | 0.0667–0.667 nmol/L | 0.9334                       |
| DB                              | $\Delta I = 1072.6C_{DB} - 219.5$     | 0.001–0.01 mmol/L   | 0.90667                      |
| Apt <sub>Pb</sub> -DB           | $\Delta I = 1640.7C_{Apt} - 1193.9$   | 0.0667–0.667 nmol/L | 0.9132                       |
| DE                              | $\Delta I = 748.4C_{DE} - 223.2$      | 0.001–0.01 mmol/L   | 0.9223                       |
| Apt <sub>Pb</sub> -DE           | $\Delta I = 1142.7C_{Apt} - 594.6$    | 0.0667–0.667 nmol/L | 0.9168                       |
| CB@AgNPs                        | $\Delta I = 9776.2C_{CB@AgNPs} + 5.4$ | 0.01–0.133 mmol/L   | 0.9991                       |
| Apt <sub>Pb</sub> -<br>CB@AgNPs | $\Delta I = 7983C_{Apt} - 278.4$      | 0.0667–0.667 nmol/L | 0.9868                       |
| AgNPs                           | $\Delta I = 5397.5C_{AgNPs} + 1.7$    | 0.01–0.133 mmol/L   | 0.9963                       |
| Apt <sub>Pb</sub> -AgNPs        | $\Delta I = 4378C_{Apt} - 304.6$      | 0.0667–0.667 nmol/L | 0.9831                       |

**Table S2.** Analysis characteristics of Pb<sup>2+</sup> detection by SERS/RRS/Abs.

| LCs      | Method | Linear range (nmol/L)         | Working curve                             | Coefficient | LD (nmol/L)        |
|----------|--------|-------------------------------|-------------------------------------------|-------------|--------------------|
| CB@AgNPs | SERS   | $4.47 \times 10^{-3} - 0.201$ | $\Delta I_{1618cm^{-1}} = 76201C - 414.6$ | 0.998       | $3 \times 10^{-3}$ |
|          | RRS    | $4.47 \times 10^{-3} - 0.201$ | $\Delta I_{370nm} = 33687C + 166$         | 0.996       | $3 \times 10^{-3}$ |
|          | Abs    | $4.47 \times 10^{-2} - 0.133$ | $\Delta A_{430nm} = 4.7887C + 0.001$      | 0.9947      | $2 \times 10^{-2}$ |
| AgNPs    | SERS   | $4.47 \times 10^{-3} - 0.133$ | $\Delta I_{1618cm^{-1}} = 55856C + 627$   | 0.9879      | $3 \times 10^{-3}$ |
|          | RRS    | $4.47 \times 10^{-3} - 0.133$ | $\Delta I_{370nm} = 28594C + 156$         | 0.9929      | $3 \times 10^{-3}$ |
|          | Abs    | $4.47 \times 10^{-2} - 0.133$ | $\Delta A_{430nm} = 3.9979C + 0.05$       | 0.986       | $2 \times 10^{-2}$ |
| CB       | SERS   | $4.47 \times 10^{-3} - 0.133$ | $\Delta I_{1618cm^{-1}} = 14840C - 13.2$  | 0.9947      | $3 \times 10^{-3}$ |
|          | RRS    | $8.94 \times 10^{-3} - 0.133$ | $\Delta I_{370nm} = 23444C + 151.5$       | 0.9915      | $5 \times 10^{-3}$ |
|          | Abs    | $4.47 \times 10^{-2} - 0.133$ | $\Delta A_{430nm} = 3.9143C + 0.03$       | 0.9808      | $2 \times 10^{-2}$ |
| OA       | SERS   | $8.94 \times 10^{-3} - 0.133$ | $\Delta I_{1618cm^{-1}} = 9658.8C - 8.2$  | 0.9888      | $5 \times 10^{-3}$ |
|          | RRS    | $8.94 \times 10^{-3} - 0.267$ | $\Delta I_{370nm} = 6444.9C + 52.7$       | 0.9887      | $5 \times 10^{-3}$ |
|          | Abs    | $6.7 \times 10^{-2} - 0.267$  | $\Delta A_{450nm} = 1.7109C + 0.03$       | 0.9687      | $3 \times 10^{-2}$ |
| HA       | SERS   | $8.94 \times 10^{-3} - 0.201$ | $\Delta I_{1618cm^{-1}} = 6255.2C + 8.4$  | 0.9887      | $5 \times 10^{-3}$ |
|          | RRS    | $8.94 \times 10^{-3} - 0.201$ | $\Delta I_{370nm} = 15079C + 207.7$       | 0.9864      | $5 \times 10^{-3}$ |
|          | Abs    | $4.47 \times 10^{-2} - 0.133$ | $\Delta A_{450nm} = 2.10C + 0.02$         | 0.9457      | $2 \times 10^{-2}$ |
| DB       | SERS   | $8.94 \times 10^{-3} - 0.201$ | $\Delta I_{1618cm^{-1}} = 12459C + 39.1$  | 0.988       | $4 \times 10^{-3}$ |
|          | RRS    | $8.94 \times 10^{-3} - 0.133$ | $\Delta I_{370nm} = 22772C + 104$         | 0.9852      | $5 \times 10^{-3}$ |
|          | Abs    | $4.47 \times 10^{-2} - 0.133$ | $\Delta A_{440nm} = 1.0C + 0.009$         | 0.9273      | $2 \times 10^{-2}$ |
| DE       | SERS   | $8.94 \times 10^{-3} - 0.133$ | $\Delta I_{1618cm^{-1}} = 7084.9C - 14.7$ | 0.987       | $5 \times 10^{-3}$ |
|          | RRS    | $8.94 \times 10^{-3} - 0.201$ | $\Delta I_{370nm} = 25518C + 311.9$       | 0.984       | $6 \times 10^{-3}$ |
|          | Abs    | $6.7 \times 10^{-2} - 0.133$  | $\Delta A_{440nm} = 3.20C + 0.05$         | 0.917       | $3 \times 10^{-2}$ |



**Table S3.** The analysis characteristics of inorganic pollutants by Apt-CB@AgNPs catalytic SERS/RRS.

| Analytes         | Method | Linear range (nmol/L)        | Working curve                                     | Coefficient | LD (nmol/L)        |
|------------------|--------|------------------------------|---------------------------------------------------|-------------|--------------------|
| Pb <sup>2+</sup> | SERS   | 4.47×10 <sup>-3</sup> –0.201 | $\Delta I_{1618\text{cm}^{-1}} = 76201C - 414.6$  | 0.998       | 3×10 <sup>-3</sup> |
|                  | RRS    | 4.47×10 <sup>-3</sup> –0.201 | $\Delta I_{370\text{nm}} = 33687C + 166$          | 0.996       | 3×10 <sup>-3</sup> |
| As <sup>3+</sup> | SERS   | 6.67×10 <sup>-3</sup> –0.133 | $\Delta I_{1618\text{cm}^{-1}} = 51005C - 92.4$   | 0.9877      | 3×10 <sup>-3</sup> |
|                  | RRS    | 6.67×10 <sup>-3</sup> –0.133 | $\Delta I_{370\text{nm}} = 29280C + 40.2$         | 0.9884      | 3×10 <sup>-3</sup> |
| Cd <sup>2+</sup> | SERS   | 6.67×10 <sup>-3</sup> –0.133 | $\Delta I_{1618\text{cm}^{-1}} = 60283C - 187.5$  | 0.9811      | 3×10 <sup>-3</sup> |
|                  | RRS    | 6.67×10 <sup>-3</sup> –0.133 | $\Delta I_{370\text{nm}} = 32880C + 132.7$        | 0.9874      | 3×10 <sup>-3</sup> |
| Hg <sup>2+</sup> | SERS   | 0.67–30                      | $\Delta I_{1618\text{cm}^{-1}} = 228.28C + 197.8$ | 0.9807      | 3                  |
|                  | RRS    | 0.67–30                      | $\Delta I_{370\text{nm}} = 211.19C + 343.3$       | 0.9867      | 3                  |

**Table S4.** Comparison of analysis characteristics between this method and the reported method.

| Method* | Method principle                                                                                                                                                                          | Linear range / (nmol/L) | DL/ (nmol/L) | Annotation                                                                                | Ref. |
|---------|-------------------------------------------------------------------------------------------------------------------------------------------------------------------------------------------|-------------------------|--------------|-------------------------------------------------------------------------------------------|------|
| FL      | The functional groups on the surface of fluorescent nanoparticles combined with Pb <sup>2+</sup> to enhance FL.                                                                           | 5–50                    | 3            | The stability is good but the detection range is not wide.                                | [37] |
| PE      | Pb <sup>2+</sup> bind to the captured DNA in the detection electrode to cause signal changes.                                                                                             | 0.5–900                 | 0.166        | High sensitivity but cumbersome substrate synthesis.                                      | [38] |
| FL      | The combination of Pb <sup>2+</sup> with the AuNP-DNA probe in the detection electrode caused a signal change.                                                                            | 0–50                    | 2.5          | Good selectivity but complicated electrode modification.                                  | [39] |
| SERS    | When Pb <sup>2+</sup> bind to ARS, colloidal clusters with high SERS activity were generated, resulting in enhanced Raman signal.                                                         | 8–20000                 | 6            | Fast and convenient but low detection sensitivity.                                        | [40] |
| SERS    | Pb(II) and Apt specifically bind to form a G-tetrad structure, and the combination of Pb(II)-Apt tetrad structure and CD Au produced a strong Raman effect.                               | 1.7–13.3                | 0.8          | The selectivity is good, but the operation is more complicated.                           | [41] |
| Abs     | TpPapd-Apt-Pb <sup>2+</sup> was combined with the DNA reaction of heme (HM), and there was a surface plasmon resonance (SPR) absorption peak at 395nm.                                    | 0.001–0.1               | 0.004        | High sensitivity, fast speed and good selectivity, but the operation is more complicated. | [25] |
| ECL     | An analytical method for the determination of lead ions had been established. Pb <sup>2+</sup> was captured by Apt 1-PtNPs and formed a G-quadruplex, and then made PtNPs close enough to | 0.1–1000                | 0.037        | The detection range is high, but the stability is poor.                                   | [42] |

|      |                                                                                                                                                             |              |        |                             |            |
|------|-------------------------------------------------------------------------------------------------------------------------------------------------------------|--------------|--------|-----------------------------|------------|
| SERS | CdTe QD to cause ECL intensity changes.                                                                                                                     | 0.0047–0.201 | 0.0036 | Sensitive, simple and fast. | This assay |
|      | The Apt combined with Pb <sup>2+</sup> to form a complex, detached from the surface of CB@AgNPs, and restored its catalysis, which enhanced the SERS signal |              |        |                             |            |

\* FL-fluorescence, PE- photoelectrochemical, ECL-electrochemiluminescence.

**Table S5.** The influence of interfering ions on the system.

| Interfering ion              | Relative multiple | Relative error (%) | Interfering ion               | Relative multiple | Relative error (%) |
|------------------------------|-------------------|--------------------|-------------------------------|-------------------|--------------------|
| Mg <sup>2+</sup>             | 1000              | 2.4                | Ca <sup>2+</sup>              | 1000              | 2.9                |
| Fe <sup>3+</sup>             | 100               | −1.9               | Zn <sup>2+</sup>              | 500               | −2.8               |
| Cu <sup>2+</sup>             | 100               | −6.3               | Al <sup>3+</sup>              | 500               | −7.1               |
| Co <sup>2+</sup>             | 500               | −1.4               | Hg <sup>2+</sup>              | 100               | 3.0                |
| Ba <sup>2+</sup>             | 1000              | −5.9               | NH <sup>4+</sup>              | 500               | 1.3                |
| Fe <sup>2+</sup>             | 1000              | 3.4                | Mn <sup>2+</sup>              | 1000              | 4.5                |
| Cr <sup>6+</sup>             | 1000              | 2.1                | Cr <sup>3+</sup>              | 1000              | −3.1               |
| NO <sub>2</sub> <sup>−</sup> | 100               | −1.4               | PO <sub>4</sub> <sup>3−</sup> | 100               | −5.5               |
| serum protein <sup>−</sup>   | 500               | −2.7               | HSA                           | 100               | −1.5               |
| BSA <sup>−</sup>             | 1000              | 3.6                | ascorbic acid                 | 500               | 1.9                |

**Table S6.** SERS measurement results of the samples.

| Sample           | Average (nmol/L) | Added Pb <sup>2+</sup> (nmol/L) | Found (nmol/L) | Recovery (%) | RSD (%) | Content (nmol/L or ng/g) |
|------------------|------------------|---------------------------------|----------------|--------------|---------|--------------------------|
| Water 1          | 0.1934           | 0.067                           | 0.2565         | 94.18        | 5.4     | 0.1945                   |
| Water 2          | 0.1801           | 0.067                           | 0.2534         | 109.4        | 7.1     | 0.1815                   |
| Water 3          | 0.1843           | 0.067                           | 0.2556         | 107.8        | 4.3     | 0.1857                   |
| Water 4          | 0.3295           | 0.067                           | 0.3989         | 103.6        | 6.1     | 0.3310                   |
| Preserved eggs 1 | 0.4287           | 0.067                           | 0.4995         | 105.67       | 1.3     | 14.796                   |
| Preserved eggs 2 | 0.4659           | 0.067                           | 0.5298         | 95.37        | 2.9     | 15.173                   |
| Preserved eggs 3 | 0.4778           | 0.067                           | 0.5482         | 105.07       | 3.5     | 15.389                   |
| Preserved eggs 4 | 0.5003           | 0.067                           | 0.5623         | 92.53        | 2.5     | 16.653                   |
| Orange peel 1    | 0.1003           | 0.067                           | 0.1632         | 93.88        | 3.2     | 4.986                    |
| Orange peel 2    | 0.1196           | 0.067                           | 0.1856         | 98.51        | 6.4     | 5.352                    |
| Orange peel 3    | 0.1284           | 0.067                           | 0.1987         | 104.9        | 5.1     | 5.435                    |
| Orange peel 4    | 0.1467           | 0.067                           | 0.2156         | 102.8        | 2.9     | 5.683                    |
